# Supplementary material
Source: PubMed Central journal article supplement (PMC5125827)

## Supplemental Materials and Methods

### Eucomm Allele of EG (*Podxl2* tm1a<sup>(EUCOMM)Wtsi</sup>), EPD0647\_7\_C06

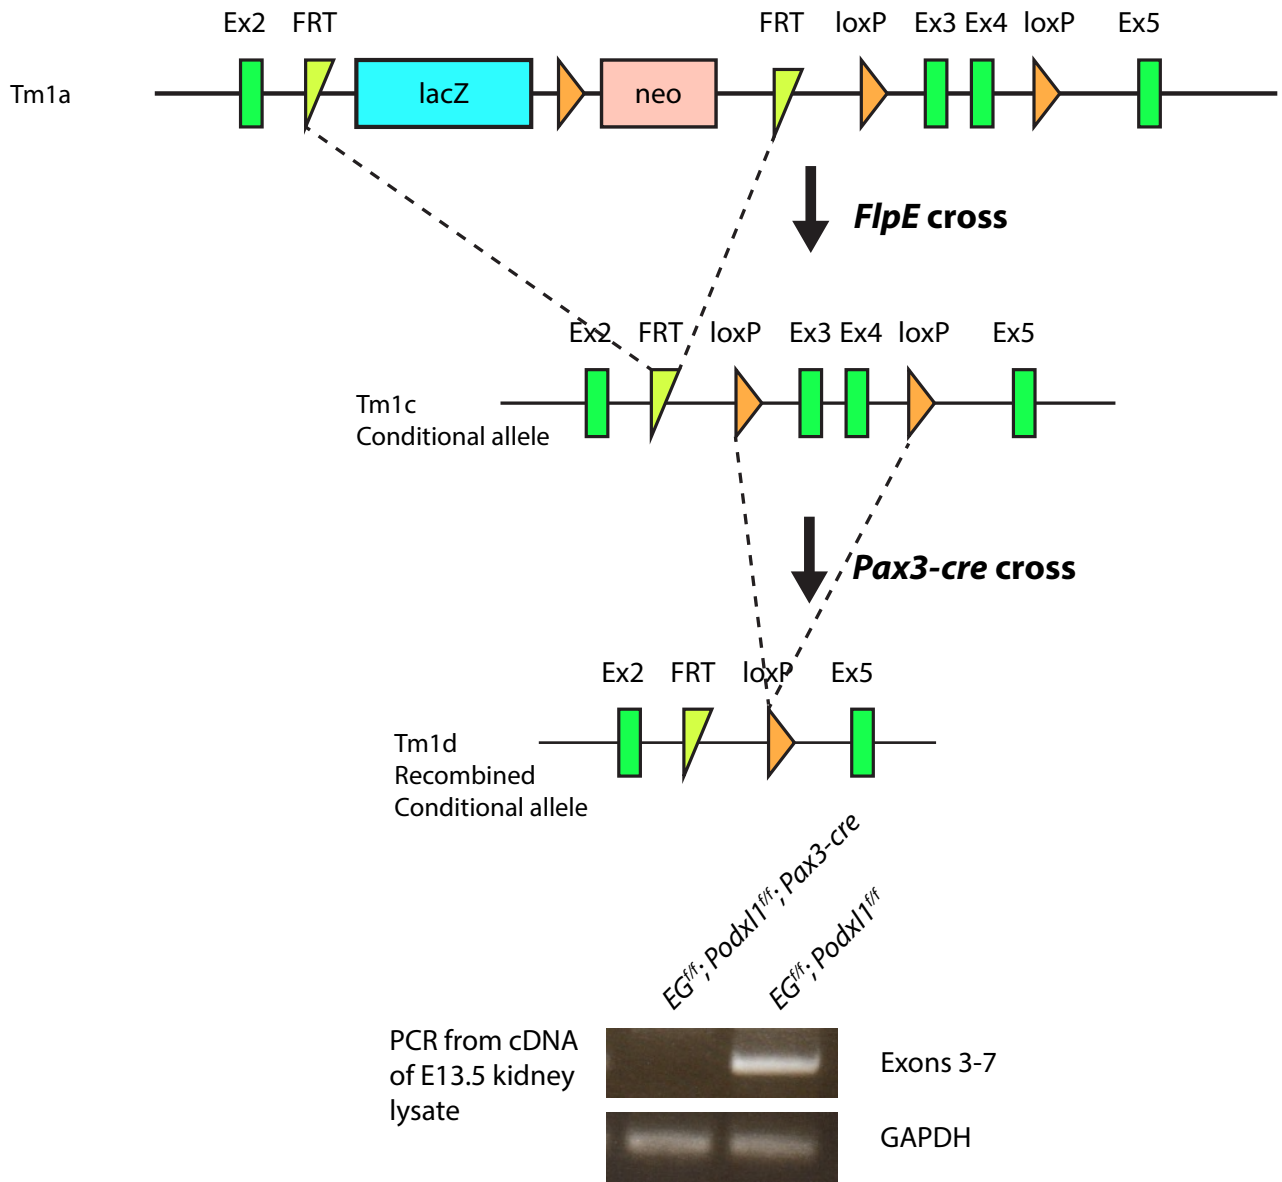

Recombination of the *EG* conditional allele by *Pax3-cre* was verified by standard genotyping, and by PCR of cDNA. For the later, total RNA was isolated from E13.5 mouse kidneys using a RNA purification kit (RNease Micro Kit, QIAGEN) and 1 µg of total RNA was used for reverse transcription (QuantiTect Reverse Transcription Kit, QIAGEN). The cDNA (50 ng) was amplified by PCR using the primers shown below. The absence of PCR product designed to amplify exons 3-7 *EG*<sup>fl/fl</sup>; *Podxl1*<sup>fl/fl</sup>; *Pax3-cre* indicates that there was complete recombination in these mice. The product of a PCR designed to amplify exons 5-7 was unaffected (not shown).

*Endoglycan (Podxl2)*: Exon 3-7, 521bp

Forward primer: CAGACTCTCTCCACCTGGA (Exon 3)

Reverse primer: CACTACAAAGAGCGTCCCGT (Exon 7)

*GAPDH*: Exon 5-6, 150bp

Forward primer: TGTGTCCGTCGTGGATCTGA (Exon 5)

Reverse primer: TTGCTGTTGAAGTCGCAGGAG (Exon 6)

Figure S1

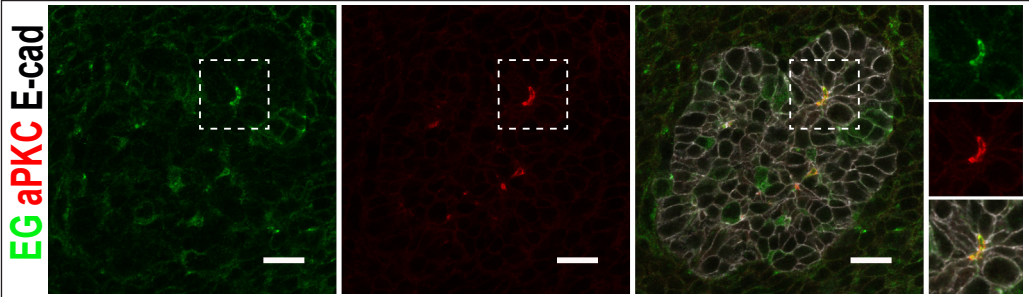

Supplement: NIHMS812941-supplement-3.pdf [file NIHMS812941-supplement-3.pdf]
