# Supplementary material
Source: PubMed Central journal article supplement (PMC5125827)

**Figure 1**

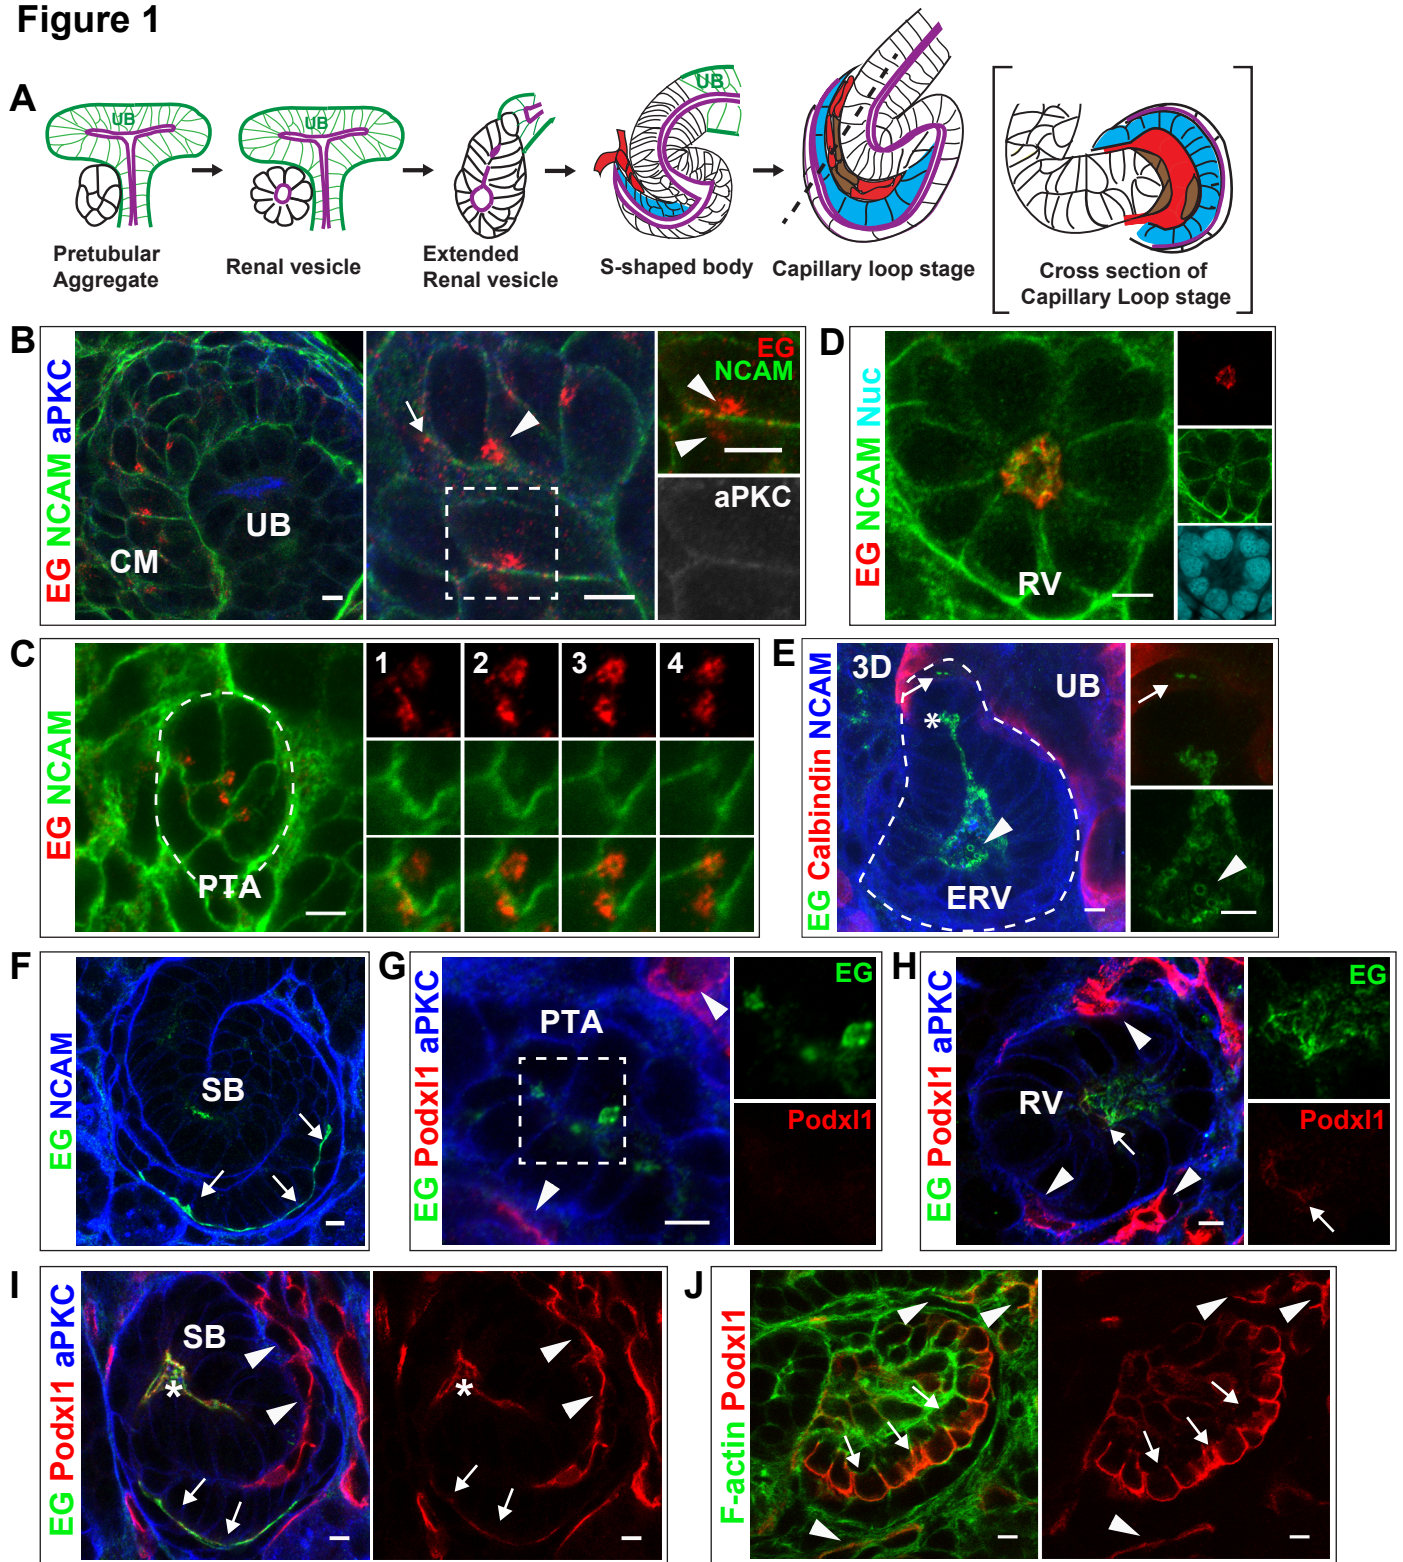

Figure 2

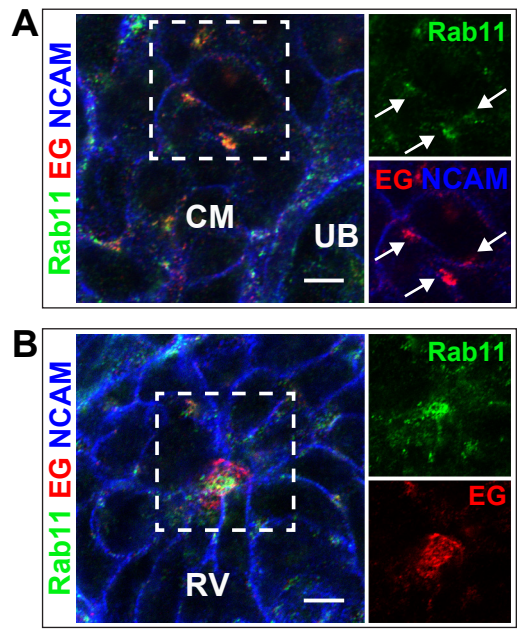

Figure 3

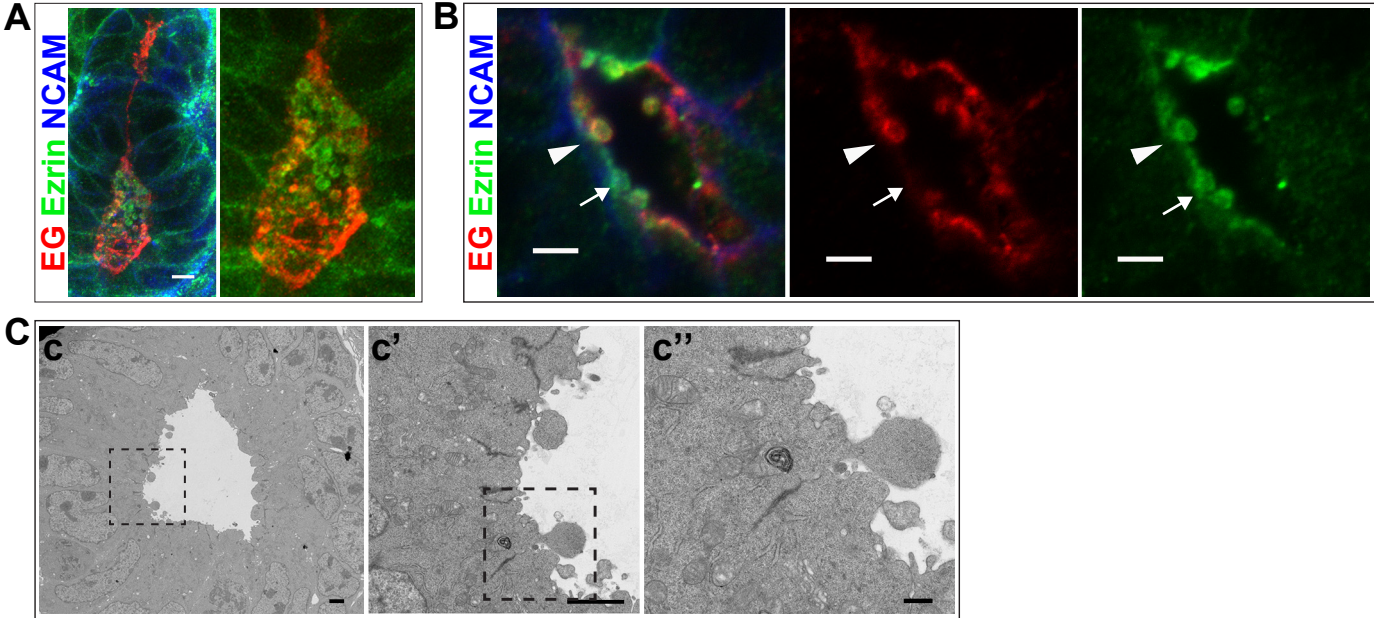

Figure 4

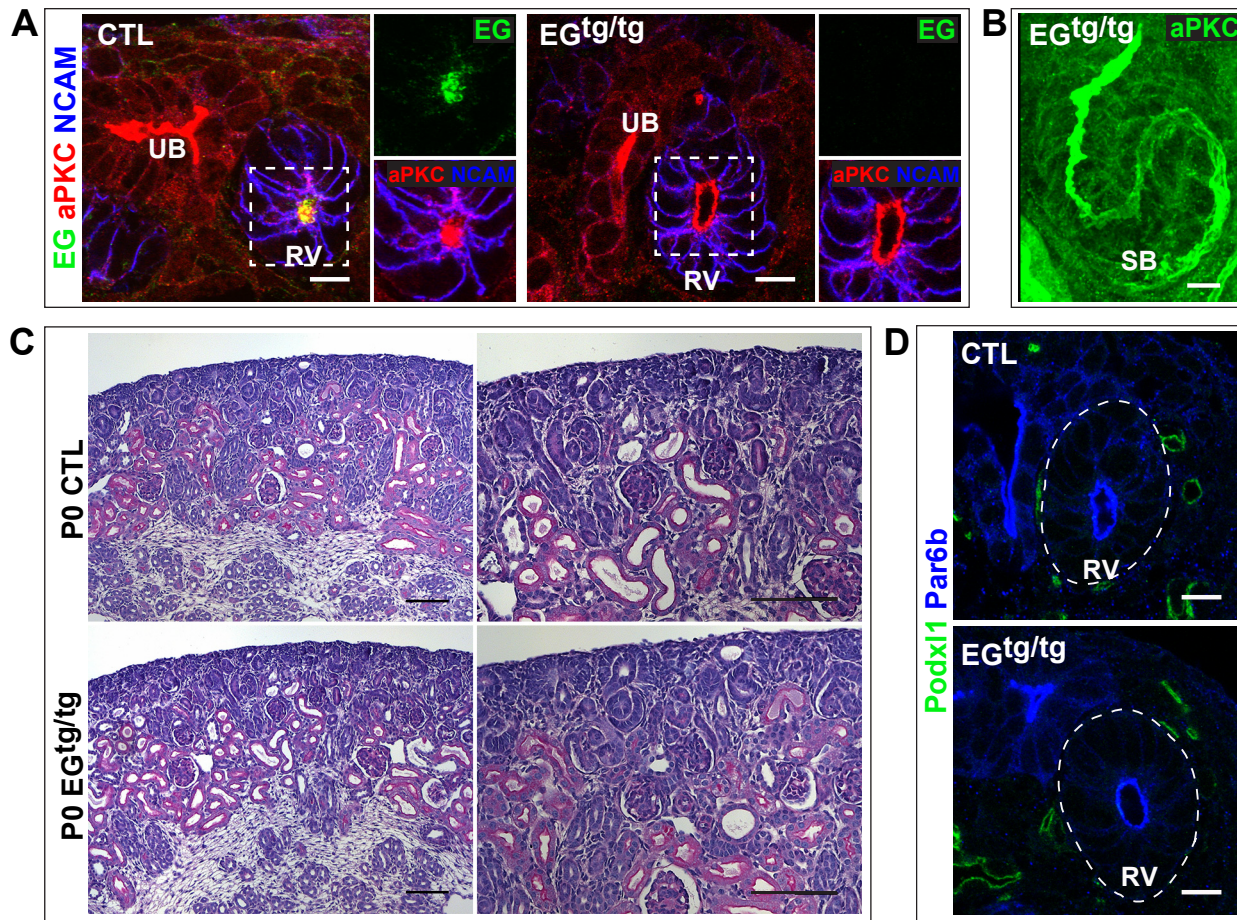

Figure 5

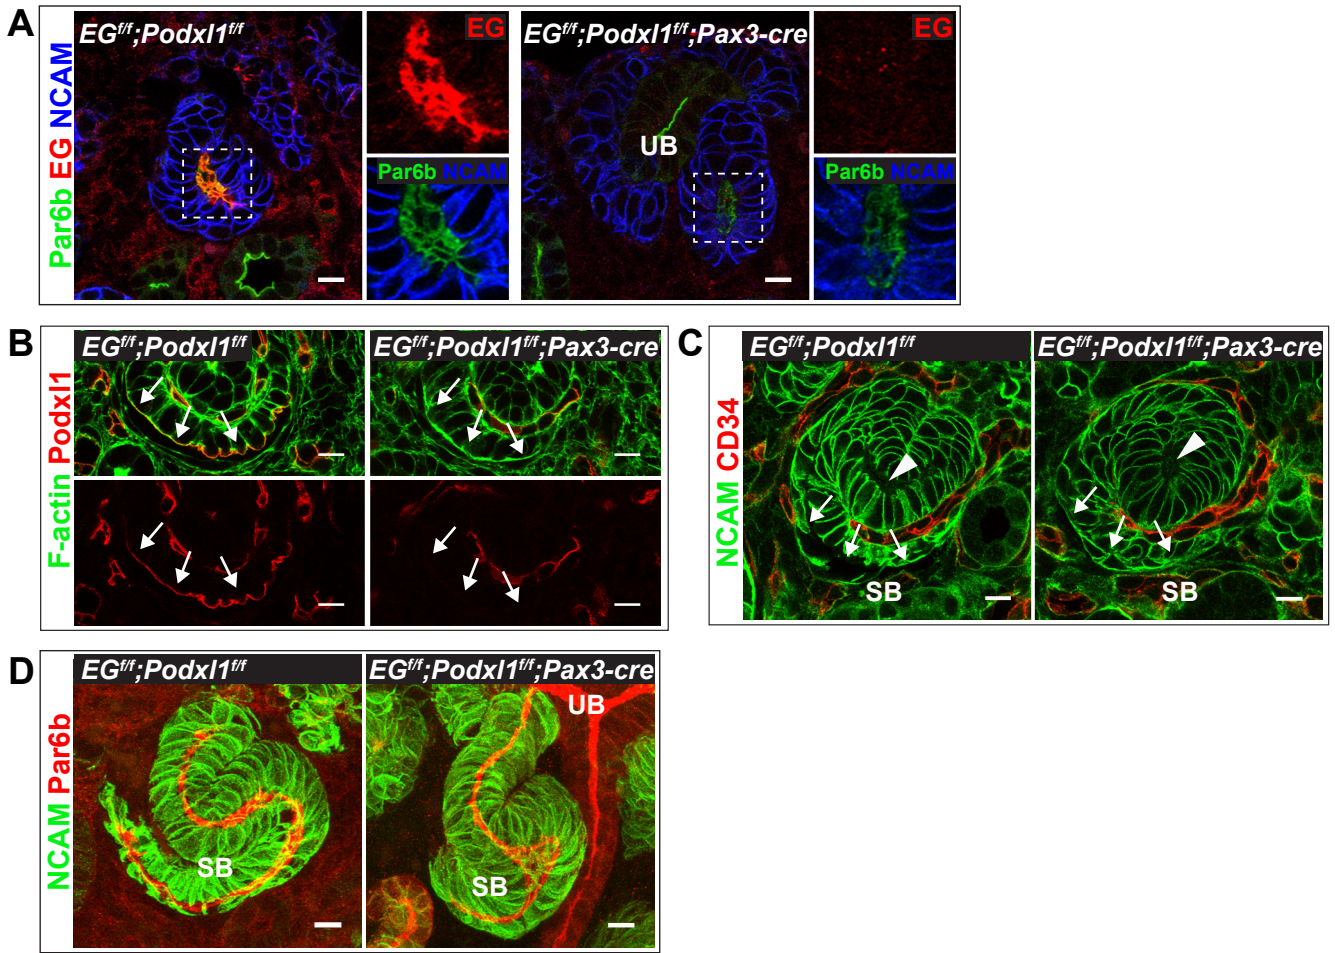

Figure 6

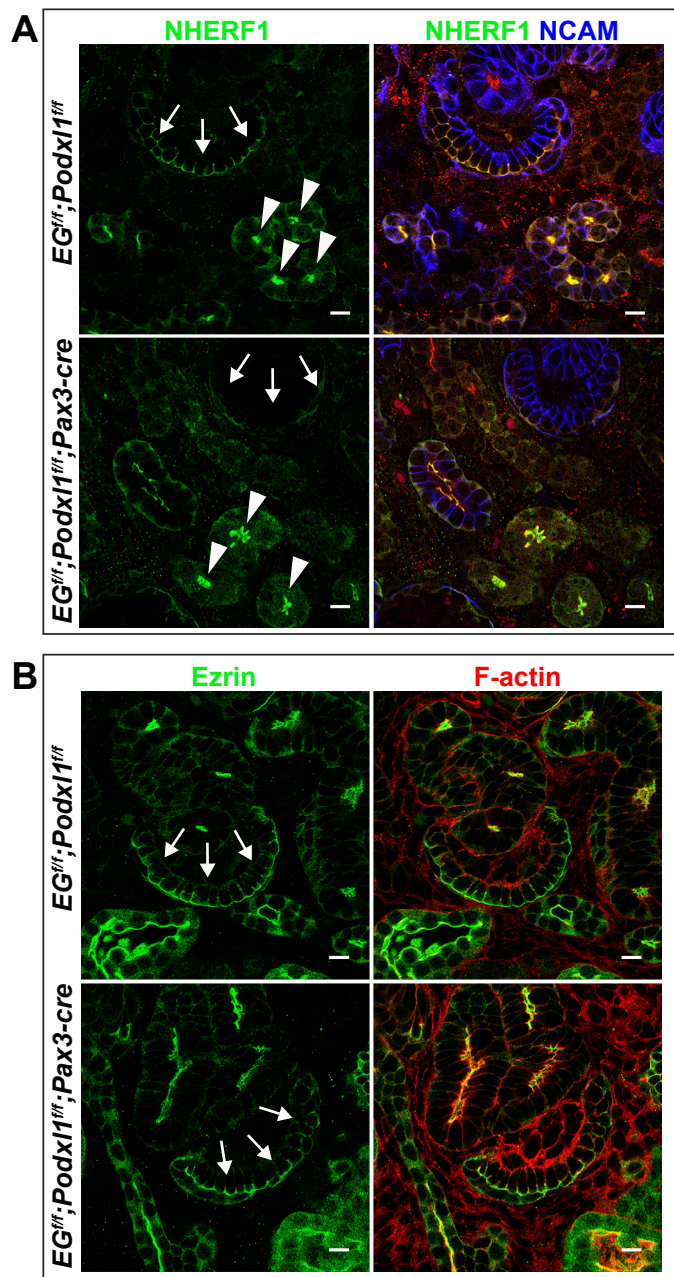

Supplement: NIHMS812941-supplement-2.pdf [file NIHMS812941-supplement-2.pdf]
